# Supplementary material
Source: publisher figshare collection journal article supplement (https://tandf.figshare.com/articles/dataset/_/5008364)
Supplement: Supplementary file 1 [file 1]

**Supplementary information 2. Physico-chemical characteristics of soil and irrigation water****A. Physical Analysis of Soil**

| $D_b$<br>( $\text{g cm}^{-3}$ ) | Soil Water Content (%) |    |     | Soil Particles (%) |      |      | Soil<br>Texture |
|---------------------------------|------------------------|----|-----|--------------------|------|------|-----------------|
|                                 | SP                     | FC | PWP | Clay               | Silt | Sand |                 |
| 1.39                            | 38                     | 22 | 9   | 33                 | 39   | 28   | Clay Loam       |

**B. Chemical Analysis of Soil: Soluble Chemicals**

| pH  | EC<br>( $\text{dS m}^{-1}$ ) | SAR  | Cations ( $\text{meq } 100 \text{ g}^{-1} \text{ Soil}$ ) |              |                  |                  | Anions ( $\text{meq } 100 \text{ g}^{-1} \text{ Soil}$ ) |                  |                 |                 |
|-----|------------------------------|------|-----------------------------------------------------------|--------------|------------------|------------------|----------------------------------------------------------|------------------|-----------------|-----------------|
|     |                              |      | $\text{Na}^+$                                             | $\text{K}^+$ | $\text{Ca}^{2+}$ | $\text{Mg}^{2+}$ | $\text{Cl}^-$                                            | $\text{HCO}_3^-$ | $\text{CO}_3^-$ | $\text{SO}_4^-$ |
| 7.8 | 1.1                          | 0.42 | 1.1                                                       | 4.9          | 6.6              | 7.1              | 2.4                                                      | 4.2              | 3.9             | 7.1             |

**C. Chemical Analysis of Soil: Chemical Ingredients**

| CEC<br>( $\text{meq } 100 \text{ g}^{-1} \text{ soil}$ ) | ESP<br>(%) | $\text{CaCO}_3$<br>(%) | Organic<br>Ingredients (%) |      | Macro-nutrient<br>Ingredients ( $\text{mg kg}^{-1} \text{ Soil}$ ) |           |           |
|----------------------------------------------------------|------------|------------------------|----------------------------|------|--------------------------------------------------------------------|-----------|-----------|
|                                                          |            |                        | OM                         | OC   | Total                                                              | Available | Available |
|                                                          |            |                        |                            |      | N                                                                  | P         | K         |
| 19.7                                                     | 5.58       | 10.4                   | 0.76                       | 0.41 | 0.06                                                               | 8.1       | 96        |

**D. Chemical Analysis of Irrigation Water: Soluble Chemicals**

| pH  | EC<br>( $\text{dS m}^{-1}$ ) | SAR  | Cations ( $\text{meq L}^{-1}$ ) |              |                  |                  | Anions ( $\text{meq L}^{-1}$ ) |                  |                 |                 |
|-----|------------------------------|------|---------------------------------|--------------|------------------|------------------|--------------------------------|------------------|-----------------|-----------------|
|     |                              |      | $\text{Na}^+$                   | $\text{K}^+$ | $\text{Ca}^{2+}$ | $\text{Mg}^{2+}$ | $\text{Cl}^-$                  | $\text{HCO}_3^-$ | $\text{CO}_3^-$ | $\text{SO}_4^-$ |
| 7.4 | 0.7                          | 0.16 | 0.3                             | 2.9          | 3.6              | 3.1              | 3.9                            | 3.5              | 3.1             | 2.8             |

$D_b$ : soil bulk density; SP: saturation point; FC: field capacity; PWP: permanent wilting point; pH: power of  $\text{H}^+$ ; EC: electrical conductivity; SAR: sodium adsorption ratio; CEC: cation exchange capacity; ESP: exchangeable sodium percentage.
